# Supplementary material for: Transcriptome Analysis of Mouse Stem Cells and Early Embryos
Source: PLOS journal article supplement (doi:10.1371/journal.pbio.0000074), 2003-12-22
Supplement: S5 (10.1371/journal.pbio.0000074.s005) [file journal.pbio.0000074.s005]

| Supplement 6: The primer sequences for RT-PCR | | | | |
| --- | --- | --- | --- | --- |
| **Clone Name** |  | **Forward Primer** |  | **Reverse Primer** |
| GAP-DH |  | 5'-CGGAGTCAACGGATTTGGTCGTAT-3' |  | 5'-GAAGATGGTGATGGGCTTCC-3' |
| K0237C06 |  | 5'-CTGTCATGATGGGTGACCAG-3' |  | 5'-CAGCTGCAGCAAGAGTCAAC-3' |
| H4064B07 |  | 5'-GATGGAAAGCAGGAAGTCCA-3' |  | 5'-CAGCCTGCTCTCACCATGTA-3' |
| H4062G10 |  | 5'-TGGCTTGTCCTGGTGTGTTA-3' |  | 5'-CTGCTTGCTCCCACTCCTAC-3' |
| H8256C04 |  | 5'-AGTGGCACCTGAAGCAAGAT-3' |  | 5'-TTCAGGGGAGTCTGGTGTTC-3' |
| H4063A09 |  | 5'-GCTGGCATGTTCCCTATCAT-3' |  | 5'-AAAAGCCAAGCATCATGTCC-3' |
| H4063H10 |  | 5'-ACAGACACGAGCCTCACCTT-3' |  | 5'-TAGAGGGACGGTTCGAGATG-3' |
| H4062G06 |  | 5'-TGGGCAGAACTAAGCCTCAT-3' |  | 5'-GTCCGTACCAGGTCAGAGGA-3' |
| K0221A09 |  | 5'-TTGAGTGGAGAGATTGCTGA-3' |  | 5'-TCCACGTTTCAAACACAGTC-3' |
| K0239E03 |  | 5'-TCTCGTGTTTTTAGGAGAGC-3' |  | 5'-CTTACAACCCTCACACCAGT-3' |
| K0286E12 |  | 5'-GGAACTGTGAATGGACTGAA-3' |  | 5'-GATCTTCGTGAATCTGGTCA-3' |
| C0807E12 |  | 5'-GTGGAAGGCTCAGTATTGCT-3' |  | 5'-TGGATGTTTGAGACAAGCAC-3' |
| C0862F07 |  | 5'-AACAAAGCACACACTGCCTA-3' |  | 5'-ATACAAGCAGCACCAGATCA-3' |
| H4005H05 |  | 5'-TCAAGCAGCAATCAGATCAT-3' |  | 5'-AGTGGTCACCCTCTCACATT-3' |
| C0328E10 |  | 5'-ACACACACAAGCATCCTGTC-3' |  | 5'-GTCATTGGGATAGGTTGAGC-3' |
| C0339F02 |  | 5'-GATGAGCCTGAAGACTAGCA-3' |  | 5'-ATCCTGATTGGTTGCTCTTT-3' |
| C0627A08 |  | 5'-ACGTGTGACAGAAACCTCAC-3' |  | 5'-GGGAATCAGTGCTCTCTCTT-3' |
| K0988E02 |  | 5'-TTGGCATGAACTAGTGGAGA-3' |  | 5'-TGAAGCATGTCATTGTTCCT-3' |
| K0976C05 |  | 5'-ATAATGGCGGTGAGAAATAA-3' |  | 5'-GTGCTCAGAAGAAACCATTC-3' |
| H4072H12 |  | 5'-CTGGTAGCTCTTACTCAAGG-3' |  | 5'-CATTTACCCTCATATTGTCC-3' |
